# Supplementary material
Source: publisher figshare collection journal article supplement (https://karger.figshare.com/ndownloader/files/13050914)
Supplement: Supplementary file 1 [file 13050914]

**Table S2**. Basal sample values for figures 1, 3, 5 and S1.

|  | Group | T3 (nmol/l) | T4 (nmol/l) | TSH (mU/l) | Corticosterone  (ng/ml) | Glucose  (mmol/l) | EGP  (µmol/kg.min) |
| --- | --- | --- | --- | --- | --- | --- | --- |
| Figure 1 | Control | 0.90±0.10 | 65.80±7.85 | 1.03±0.12 | 11.75±5.44 |  |  |
| Cold | 0.99±0.06 | 74.4±1.60 | 2.41±0.22 | 6.43±0.37 |  |  |
| P value | 0.460 | 0.339 | 0.003 | 0.400 |  |  |
| Figure 3 | Control | 0.83±0.10 | 65.00±6.00 | 0.48±0.12 | 40.38±15.49 |  |  |
| TRH | 1.21±0.19 | 71.17±2.89 | 1.11±0.29 | 37.79±21.53 |  |  |
| P value | 0.327 | 0.343 | 0.289 | 0.779 |  |  |
| Figure 5A, B | Control |  |  |  |  | 5.8±0.16 | 47.9±3.12 |
| TRH |  |  |  |  | 5.8 ±0.07 | 57.0±5.30 |
| P value |  |  |  |  | 0.823 | 0.159 |
| Figure 5C, D | SHAM |  |  |  |  | 5.6±0.13 | 44.8±2.36 |
| HSX |  |  |  |  | 5.6 ±0.10 | 52.9±2.94 |
| HPX |  |  |  |  | 5.8 ±0.18 | 48.3 ±4.70 |
| P value |  |  |  |  | 0.292 | 0.198 |
| Figure S1 | Control |  |  |  |  | 6.3±0.16 | 52.8±3.22 |
| TRH ICV |  |  |  |  | 5.8±0.11 | 64.9±4.77 |
| P value |  |  |  |  | 0.032 | 0.099 |
| Control |  |  |  |  | 5.75±0.11 |  |
| TRH IV |  |  |  |  | 5.61 ±0.10 |  |
| P value |  |  |  |  | 0.369 |  |
